# Supplementary material for: Extracellular calcium promotes bone formation from bone marrow mesenchymal stem cells by amplifying the effects of BMP-2 on SMAD signalling
Source: PubMed Central journal article supplement (PMC5444778; doi:10.1371/journal.pone.0178158), 2017-05-25

*Alpl*

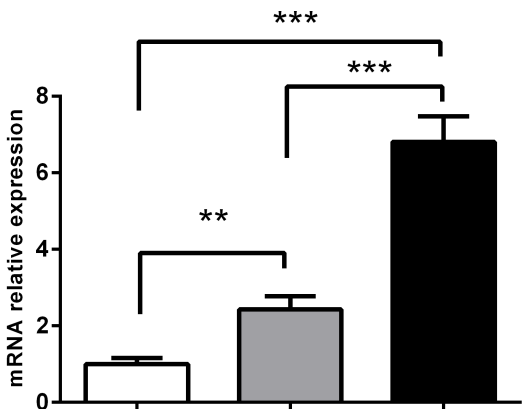

*Osteocalcin*

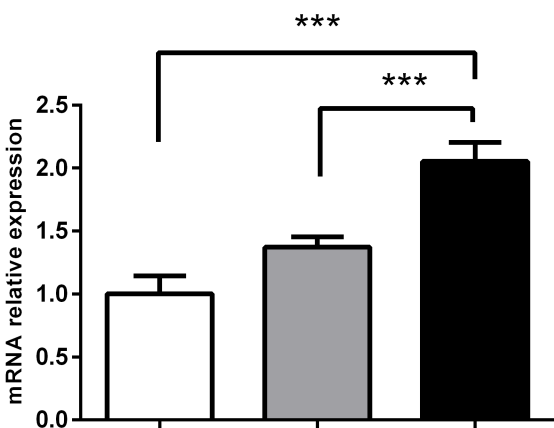

*Osterix*

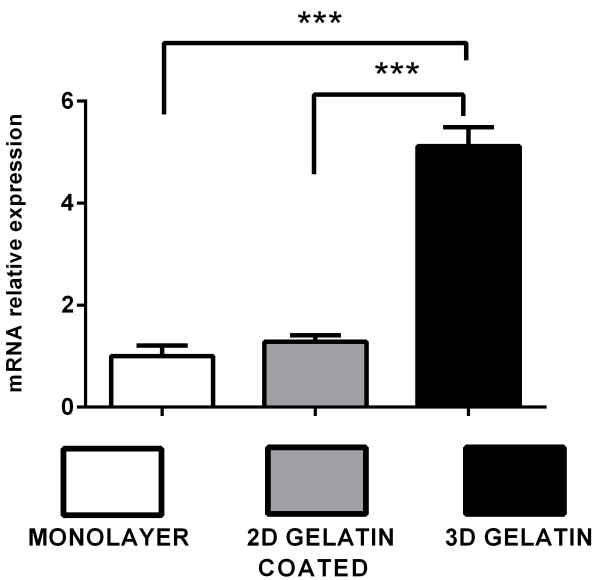

Supplement: pone.0178158.s001.pdf [file pone.0178158.s001.pdf]
