# Supplementary material for: Extracellular calcium promotes bone formation from bone marrow mesenchymal stem cells by amplifying the effects of BMP-2 on SMAD signalling
Source: PubMed Central journal article supplement (PMC5444778; doi:10.1371/journal.pone.0178158), 2017-05-25

## Osteocalcin

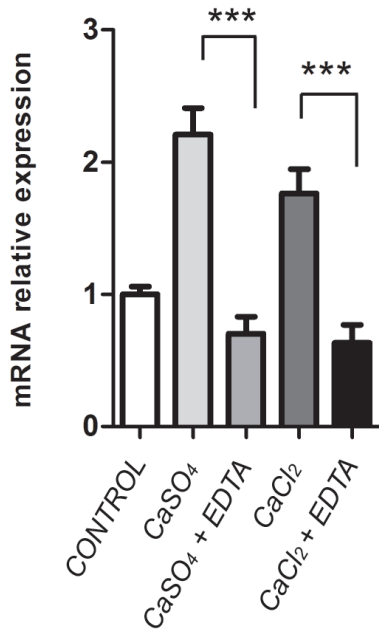

## Runx2

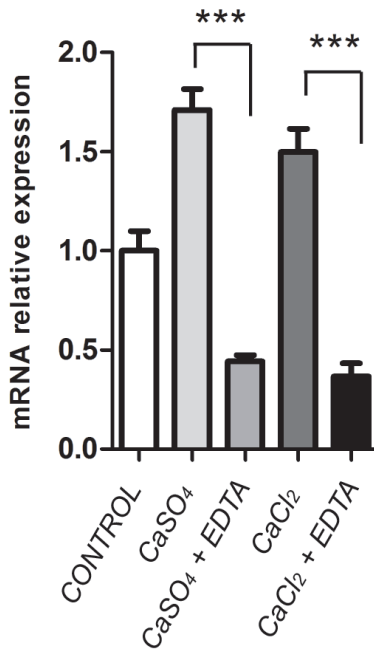

## Osterix

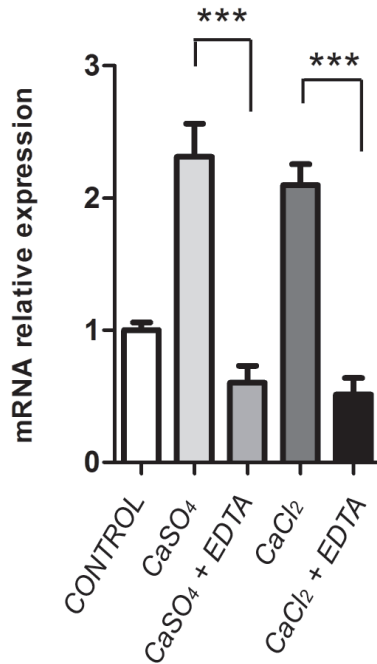

Supplement: pone.0178158.s002.pdf [file pone.0178158.s002.pdf]
